# Supplementary material for: Temporal epigenome modulation enables efficient bacteriophage engineering and functional analysis of phage DNA modifications
Source: PubMed Central journal article supplement (PMC11404850; doi:10.1371/journal.pgen.1011384), 2024-09-04
Supplement: pgen.1011384.s001.pdf [file pgen.1011384.s001.pdf]

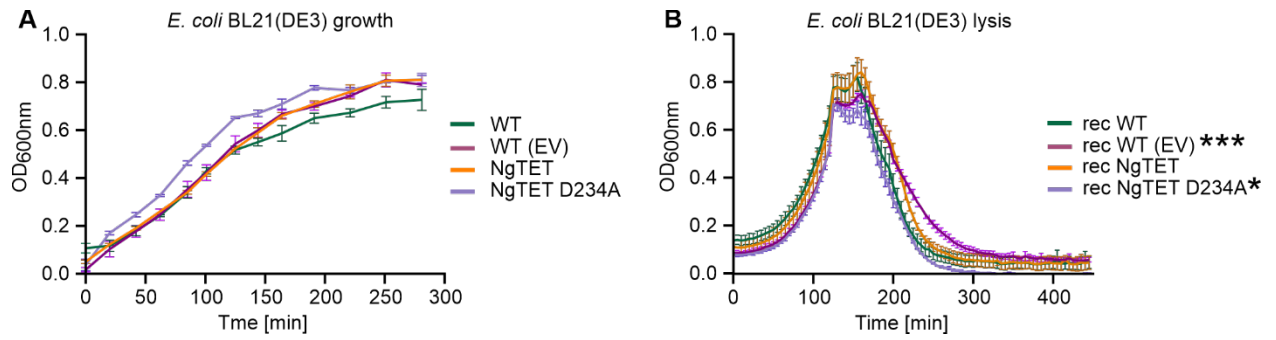

**S1 Fig: Growth and lysis of *E. coli* upon different conditions.**

**(A)** Impact of NgTET recombinant expression on *E. coli* growth.  $n = 3$  biological replicates. **(B)**

Lysis of *E. coli* by the phages recovered from different conditions.  $n = 3$  biological replicates.
