# Supplementary material for: Temporal epigenome modulation enables efficient bacteriophage engineering and functional analysis of phage DNA modifications
Source: PubMed Central journal article supplement (PMC11404850; doi:10.1371/journal.pgen.1011384), 2024-09-04
Supplement: pgen.1011384.s002.pdf [file pgen.1011384.s002.pdf]

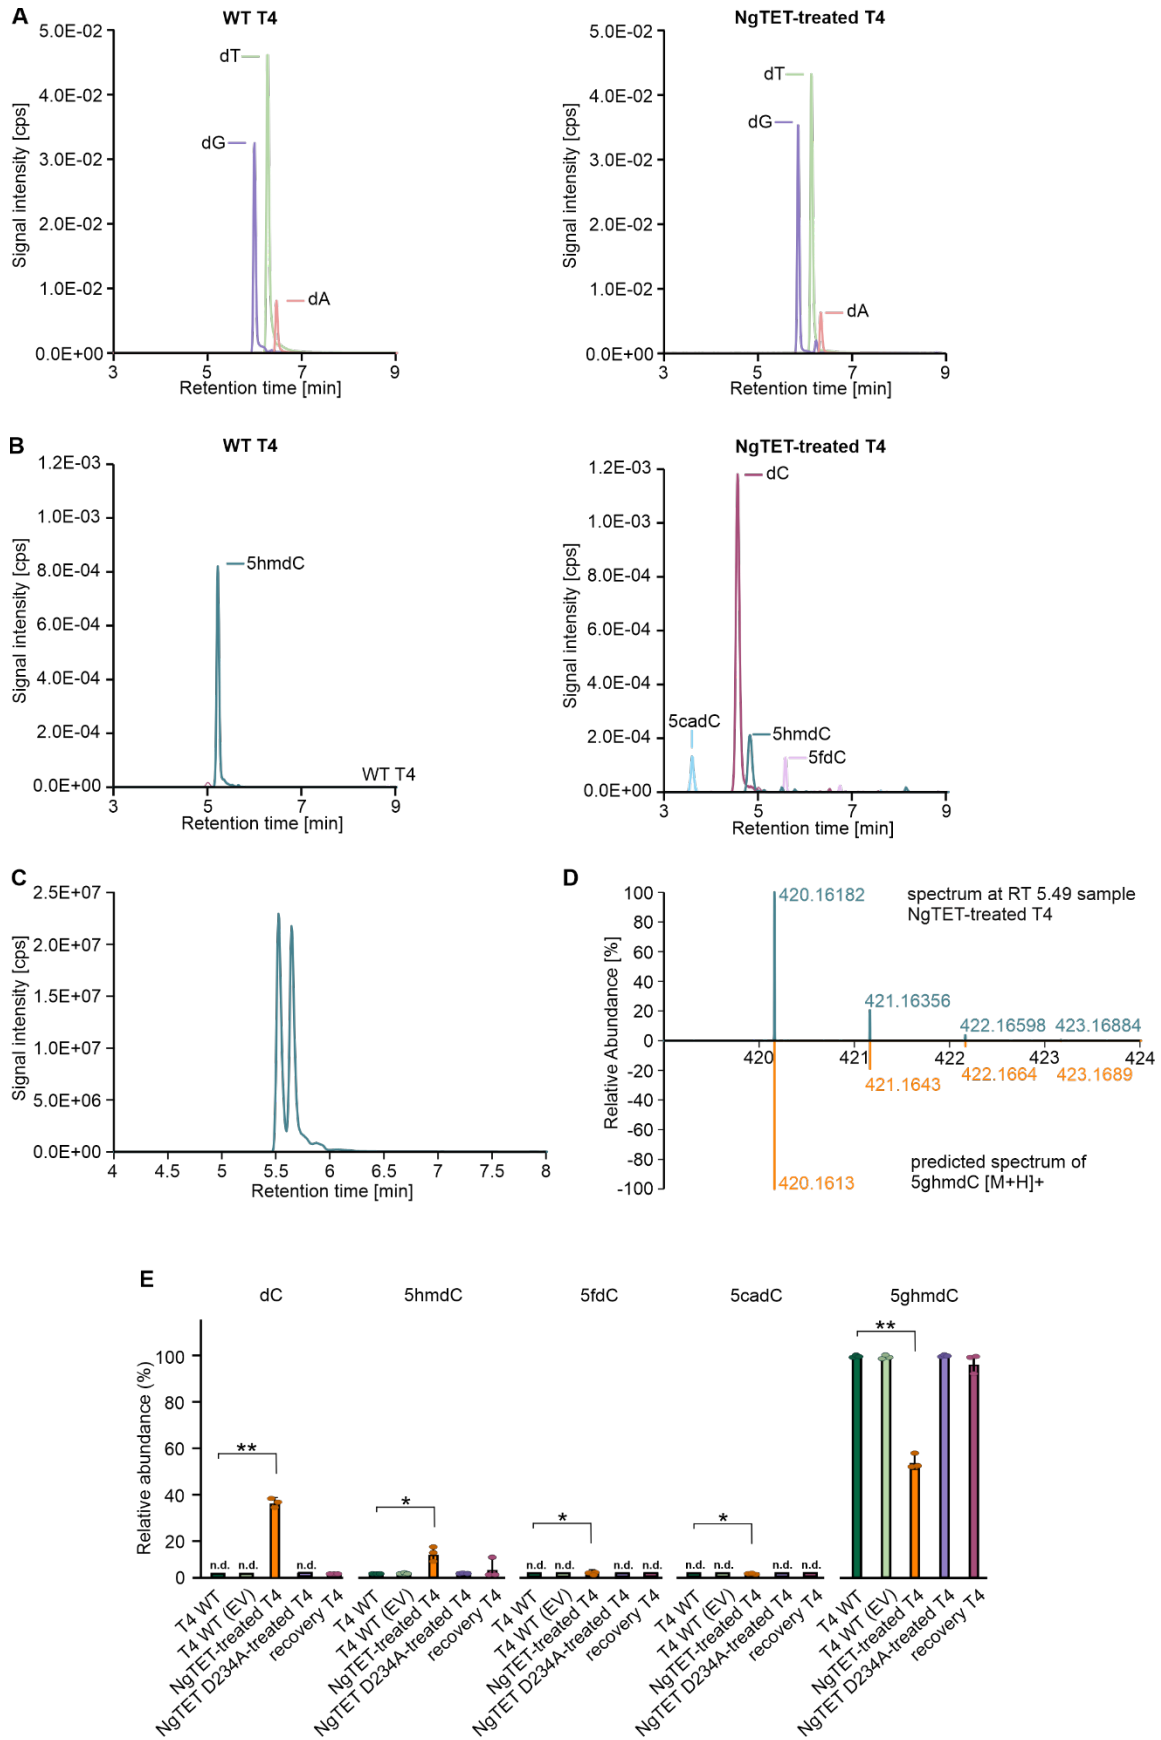

**S2 Fig: LC-MS analysis of T4 DNA composition.**

**(A-B)** Extracted ion chromatogram overlay of nucleotide mass traces in T4 WT DNA (front) and NgTET-treated T4 DNA (back). Data exemplifies differences in relative abundances of cysteine nucleotides (dC, 5hmdC, 5fdC, 5cadC) **(B)** while dG, dT and dA **(A)** show similar trends. Signal intensities have been normalized against the overall nucleotide signal in the respective sample to correct for differences in sample concentration and injection volume. **(C-D)** Extracted ion chromatogram of presumed 5ghmdC **(C)**. The fragmentation pattern of presumed 5ghmdC corresponds to the predicted one **(D)**. **(E)** Relative abundance of cytosine derivatives in T4 phage isolated from different strains (two-sided Student's t-test, \* -  $P_{\text{signif}} < 0.05$ , \*\* -  $P_{\text{signif}} < 0.025$ ; n.d.: not detected).  $n = 3$  biological replicates.
