# Supplementary material for: Temporal epigenome modulation enables efficient bacteriophage engineering and functional analysis of phage DNA modifications
Source: PubMed Central journal article supplement (PMC11404850; doi:10.1371/journal.pgen.1011384), 2024-09-04
Supplement: pgen.1011384.s003.pdf [file pgen.1011384.s003.pdf]

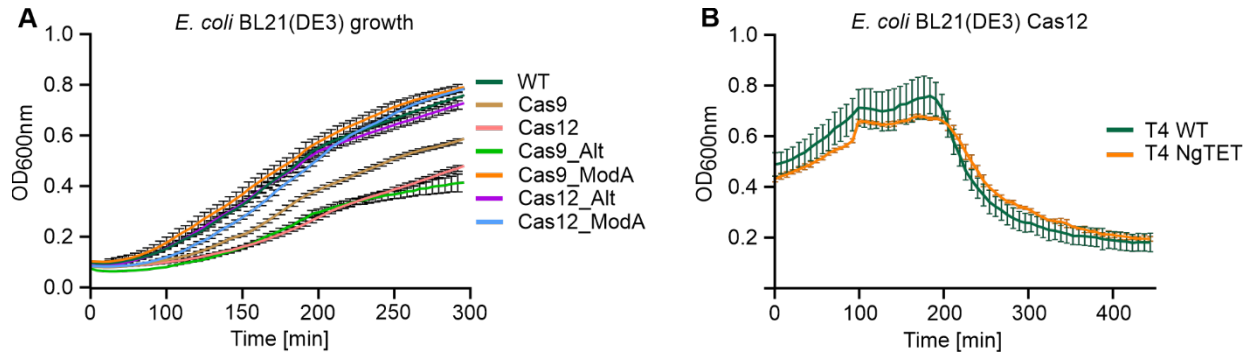

**S3 Fig: Effect of Cas expression on growth and lysis of *E. coli*.** (A) Impact of CRISPR/Cas9 or Cas12 systems recombinant expression on *E. coli* growth.  $n = 3$  biological replicates. (B) Impact of CRISPR/Cas12 system recombinant expression on T4 WT and T4 NgTET lysis efficiency.  $n = 3$  biological replicates.
