# Supplementary material for: Temporal epigenome modulation enables efficient bacteriophage engineering and functional analysis of phage DNA modifications
Source: PubMed Central journal article supplement (PMC11404850; doi:10.1371/journal.pgen.1011384), 2024-09-04
Supplement: pgen.1011384.s004.pdf [file pgen.1011384.s004.pdf]

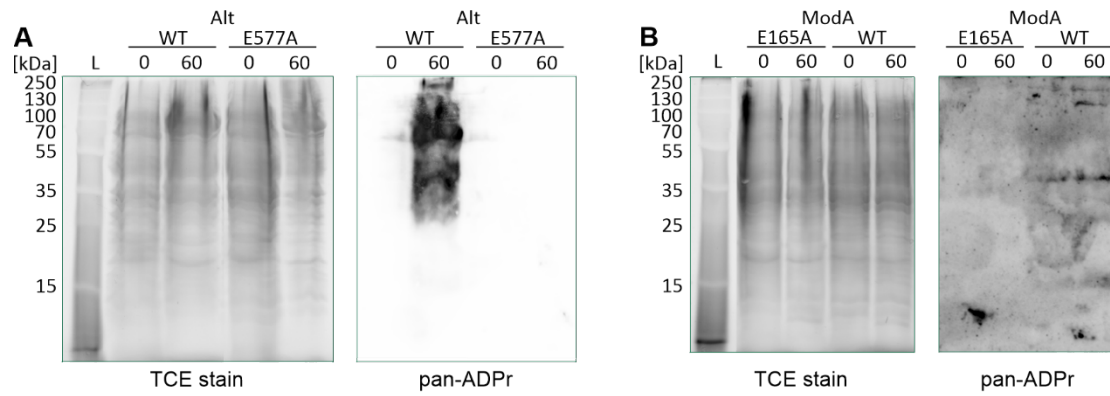

**S4 Fig: Validation of Alt and ModA ARTs inactivation via Alt E577A and ModA E165A mutations. (A-B)** Stain-free scan (TCE stain, loading control, left) and Western blot analysis (pan-ADPr antibody for ADP-ribosylation detection, right) to identify ADP-ribosylation events by ARTs and their mutants. Both mutants demonstrate complete abolishment of ADP-ribosylation.  $n = 3$  biological replicates, a representative example is shown.
