# Supplementary material for: Temporal epigenome modulation enables efficient bacteriophage engineering and functional analysis of phage DNA modifications
Source: PubMed Central journal article supplement (PMC11404850; doi:10.1371/journal.pgen.1011384), 2024-09-04
Supplement: pgen.1011384.s005.pdf [file pgen.1011384.s005.pdf]

**A**

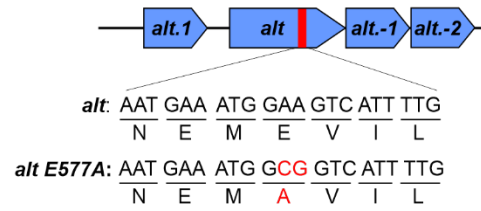

**B**

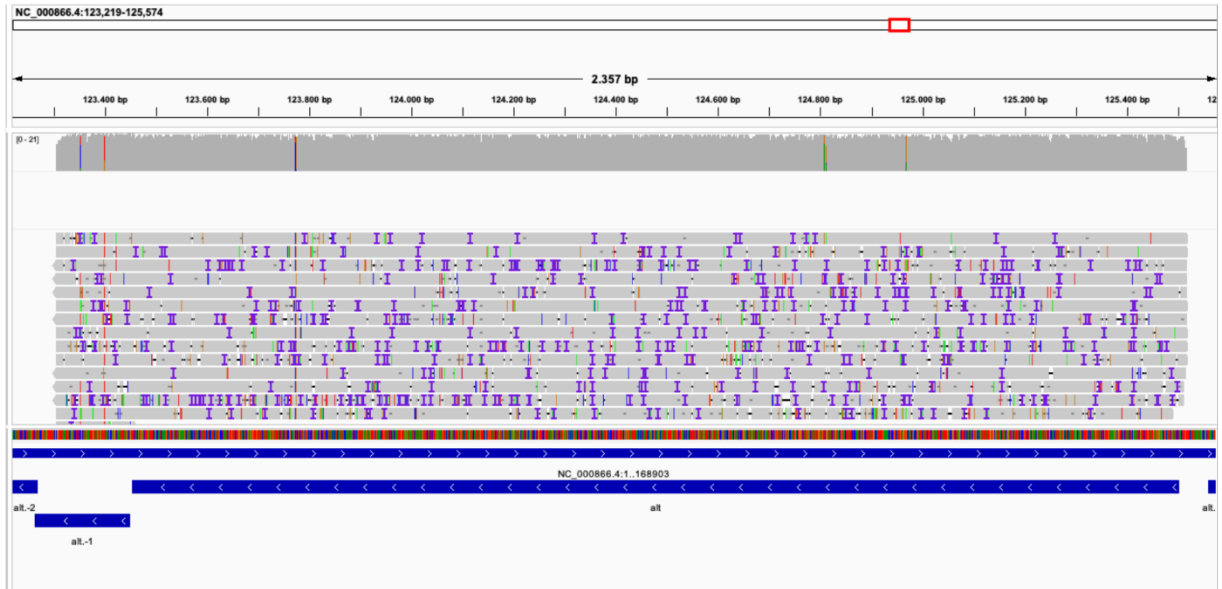

**C**

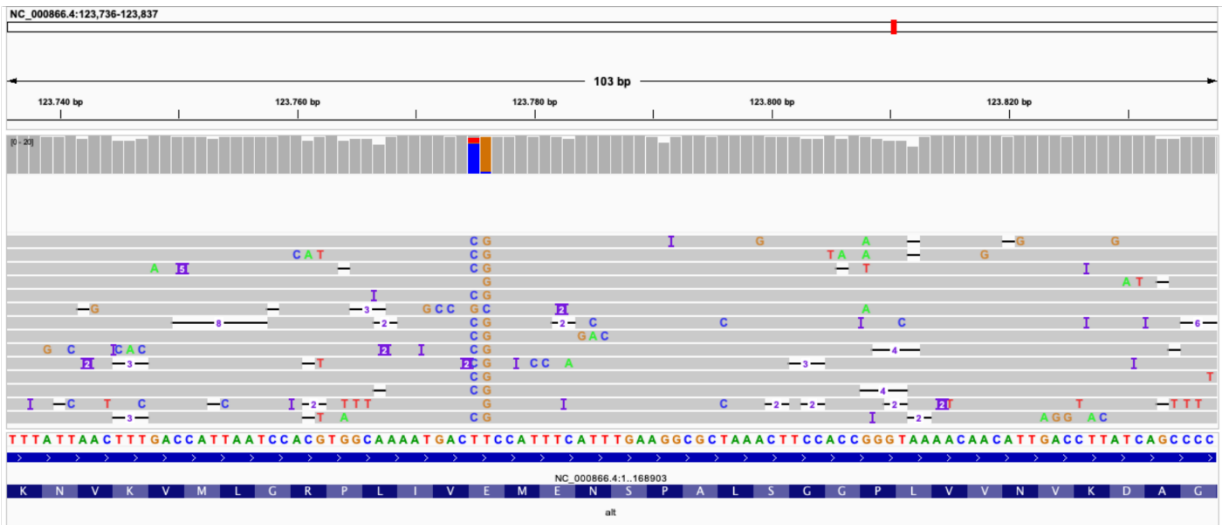

**S5 Fig: *Alt* mutants sequencing summary. (A)** The targeted mutation site in *alt* gene. **(B)** Sequence coverage at the mutation site. **(C):** Alt E577A mutant.
