# Supplementary material for: Temporal epigenome modulation enables efficient bacteriophage engineering and functional analysis of phage DNA modifications
Source: PubMed Central journal article supplement (PMC11404850; doi:10.1371/journal.pgen.1011384), 2024-09-04
Supplement: pgen.1011384.s006.pdf [file pgen.1011384.s006.pdf]

**A**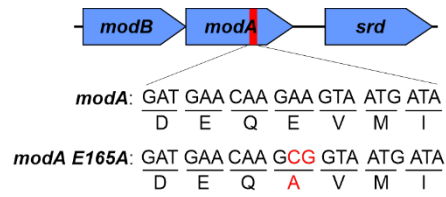**B**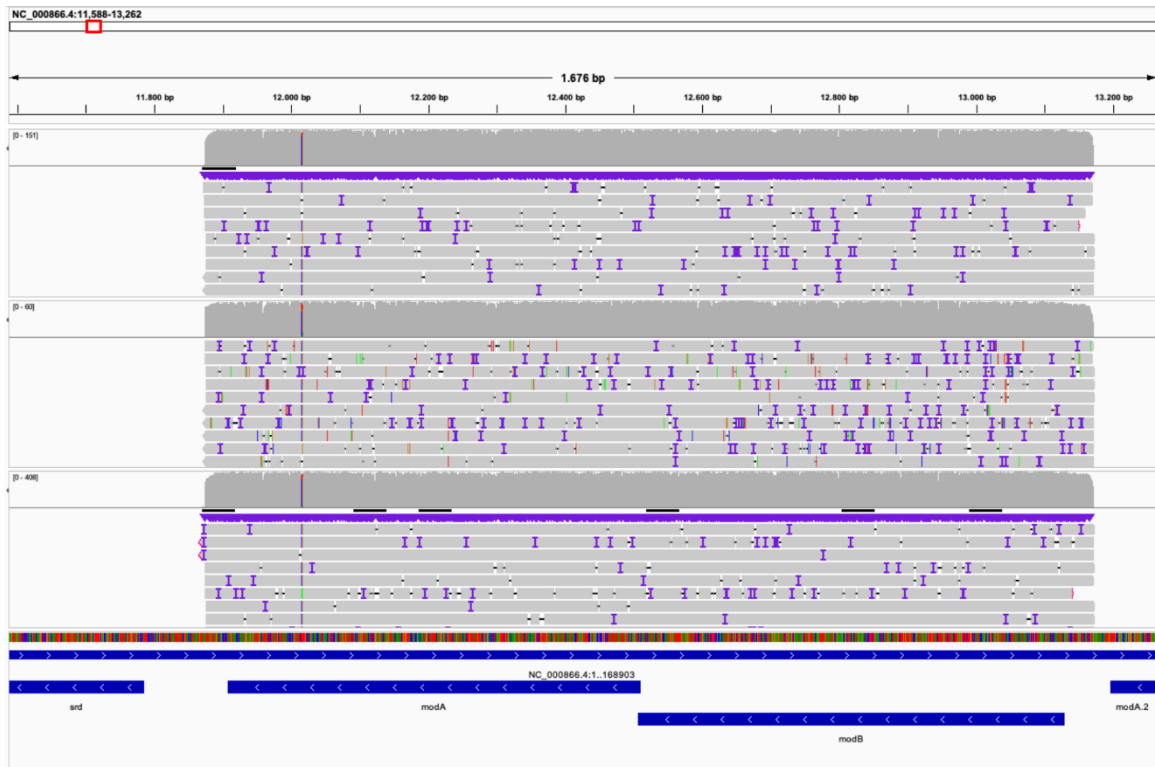**C**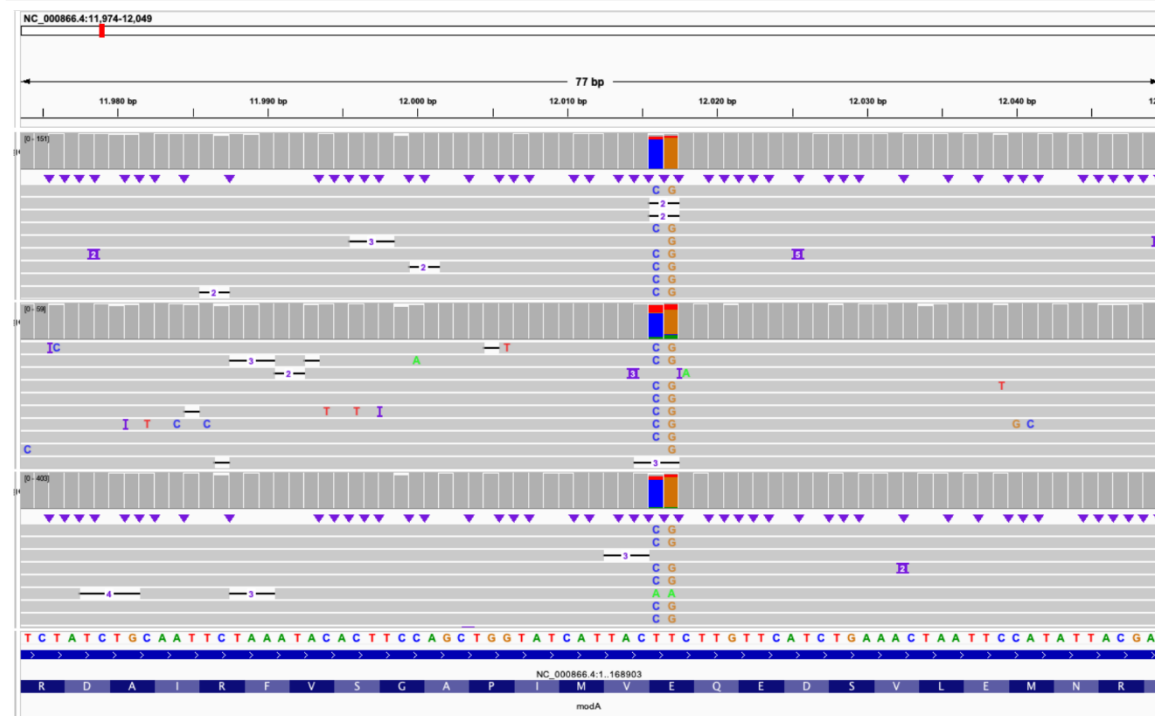

**S6 Fig: *ModA* mutants sequencing summary. (A)** The targeted mutation site in *modA* gene. **(B)** Sequence coverage at the mutation site. **(C)** *ModA* E165A mutant
